1 **Stage-specific transcriptomes and DNA methylomes indicate an early and**  
2 **transient loss of transposon control in Arabidopsis shoot stem cells**

3

4 Ruben Gutzat<sup>1</sup>, Klaus Rembart<sup>1</sup>, Thomas Nussbaumer<sup>2</sup>, Rahul Pisupati<sup>1</sup>, Falko Hofmann<sup>1</sup>,  
5 Gabriele Bradamante<sup>1</sup>, Nina Daubel<sup>1#</sup>, Angelika Gaidora<sup>1§</sup>, Nicole Lettner<sup>1</sup>, Mattia Donà<sup>1</sup>,  
6 Magnus Nordborg<sup>1</sup>, Michael Nodine<sup>1</sup>, Ortrun Mittelsten Scheid<sup>1</sup>

7

8 <sup>1</sup> *Gregor Mendel Institute (GMI), Austrian Academy of Sciences, Vienna BioCenter (VBC),*  
9 *Dr. Bohr-Gasse 3, 1030 Vienna, Austria.*

10 <sup>2</sup> *Institute of Environmental Medicine, UNIKA-T, Helmholtz Center Munich, Augsburg,*  
11 *Germany.*

12 <sup>#</sup> *present address: Uppsala University, Uppsala, Sweden*

13 <sup>§</sup> *present address: University of Natural Resources and Life Sciences, Vienna, Austria*

14

15

16 **In contrast to animals, postembryonic development in plants is modular, and aerial**  
17 **organs originate from stem cells in the center of the shoot apical meristem (SAM)**  
18 **throughout life. Descendants of SAM stem cells in the subepidermal layer (L2) will give**  
19 **also rise to male and female gametes <sup>1</sup>and therefore can be considered primordial germ**  
20 **cells. In these cells, transmission of somatic mutations including virus and TE insertions**  
21 **must be avoided. Despite their essential role for plant development and intergenerational**  
22 **continuity, a comprehensive molecular analysis of SAM plant stem cells has been missing,**  
23 **due to their low number, deep embedding among non-stem cells and difficult isolation.**  
24 **Here we present a comprehensive analysis of stage-specific gene expression and DNA**  
25 **methylation dynamics in Arabidopsis SAM stem cells. This revealed that stem cell**  
26 **expression signatures are mostly defined by development, but we also identified a core set**  
27 **of differentially expressed stemness genes. Surprisingly, vegetative SAM stem cells**  
28 **showed increased expression of transposable elements (TEs) relative to surrounding cells,**  
29 **despite high expression of genes connected to epigenetic silencing. We also find increasing**  
30 **methylation at CHG and a drop in CHH methylation at TEs before stem cells enter the**  
31 **reproductive lineage, indicating an onset of epigenetic reprogramming at an early stage.**  
32 **Transiently elevated TE expression is reminiscent of that in animal primordial germ cells**  
33 **(PGCs) <sup>2</sup> and demonstrates commonality of transposon biology. Our results connect SAM**  
34 **stem cells with germline development and transposon evolution and will allow future**  
35 **experiments to determine the degree of epigenetic heritability between generations.**

36

37 In contrast to short and straight germlines in animals, plants have multiple germlines in the  
38 form of meristems, and, if necessary, these can even be generated *de novo* from differentiated  
39 cells. Meristems are tissue in regions of plant growth and contain a few stem cells that give rise  
40 to various derivatives, including gametes. In Arabidopsis, the SAM stem cell niche is marked

41 by expression of the *CLAVATA3* (*CLV3*) gene. Other transcription factors, signaling molecules  
42 (including *CLV3*), and receptors (for review see e.g.<sup>3,4</sup>) are necessary for stem cell  
43 maintenance, however, our knowledge of the characteristics of “stemness” and the molecular  
44 signatures of plant stem cells remains very limited. In order to overcome technical difficulties  
45 associated with stem cell isolation, the number of *CLV3*-expressing cells was increased using  
46 an *ap1-1; call-1* double-mutant and enabled the first stem cell transcriptome<sup>5,6</sup>. However these  
47 plants show stem cell-related phenotypic aberrations, and the analysis was limited to floral  
48 meristems. A recent study used the INTACT method to gain insights into gene expression and  
49 histone H3 modification dynamics of the entire SAM, but nonetheless included different cell  
50 types and gene expression domains<sup>7</sup>. With the same method, nuclei from SAM stem cells and  
51 differentiated leaves were isolated and compared for chromatin accessibility<sup>8</sup>. We wanted to  
52 obtain information about gene expression and DNA methylation of pure SAM stem cell  
53 fractions and generated Arabidopsis plants expressing a transcriptional fusion of the *CLV3*  
54 promoter<sup>9</sup> and mCherry-labelled histone H2B. Microscopic analysis demonstrated correct and  
55 specific expression of the *pCLV3:mCherry-H2B* marker in nuclei of approximately 20-40 stem  
56 cells in 14-day-old seedlings (Fig. 1a). We applied fluorescence-activated nuclear sorting  
57 (FANS)<sup>10</sup> to nuclei isolated from tissue manually enriched for shoot apical meristems and  
58 collected mCherry-positive and -negative nuclei, with non-transgenic plants as controls (Fig.  
59 1b, Supplementary Fig. 1a, Supplementary Table 1). Microscopic analysis confirmed that all  
60 sorted nuclei from the positive channel appeared intact and displayed red fluorescence,  
61 validating the purity of the fraction (Supplementary Fig. 1b). The transcript level of endogenous  
62 *CLV3* was more than 1000-fold higher in mCherry-positive versus mCherry-negative nuclei or  
63 whole seedlings (Fig. 1c). General RNA expression of sorted nuclei was highly correlated with  
64 total RNA expression (Pearson correlation coefficient = 0.94; Supplementary Fig. 1c),  
65 indicating that nuclear RNA represents well the transcriptome of whole cells. Therefore, we

66 will refer to samples from mCherry/*CLV3*-positive nuclei as stem cells and to mCherry/*CLV3*-  
67 negative samples from the closest neighboring tissue as non-stem cells.

68 We generated and sequenced RNA expression libraries from stem and non-stem cells isolated  
69 from heart through torpedo stage embryos (E), 7 day- (D7), 14 day- (D14), and 35 day- (D35)  
70 old plants (Supplementary Fig. 2a,b, Supplementary Table 2), aiming (i) to identify expression  
71 signatures in stem cells preceding major developmental switches, (ii) to find genes that are  
72 involved in epigenetic resetting and germline formation, and (iii) to detect “stemness core  
73 genes” whose expression would characterize stem cells independent of development.  
74 Normalized read counts demonstrated high enrichment of *CLV3* and *mCherry* transcripts in  
75 stem cells at all developmental stages (Fig. 2a). High expression of the meristem marker genes  
76 *STM* and *KNAT1* relative to nuclei of 14-day-old whole seedlings (S14) confirmed the  
77 meristematic features of the non-stem cells (Fig. 2a).

78 Transcriptome-wide clustering analysis showed that the expression signature of stem cells is  
79 dominated by the respective developmental stage rather than by cell type (Fig. 2b). Pairwise  
80 comparison between stem cells with the respective non-stem cells revealed differentially  
81 expressed genes (DEGs,  $q < 0.05$ ) at all four timepoints, respectively (Fig. 2c), the majority  
82 upregulated in stem cells (with the exception of the embryo samples). Interestingly, GO term  
83 analysis revealed that GOs describing reproductive processes, floral organ development, and  
84 inflorescence development were already enriched in E, D7, and D14 (Supplementary Table 3,  
85 Supplementary Fig. 3), while their absence in D35 stem cells was likely due to the low number  
86 of DEGs.

87 Overlap analysis between samples (Fig. 2d, Supplementary Fig. 4) revealed many stage-  
88 specific DEGs but also identified a set of 10 core genes (including *CLV3*) that were more highly  
89 expressed in stem cells of all four stages (Fig. 2a, Supplementary Fig. 4 and 5, Supplementary  
90 Table 4), and 23 genes with elevated expression in three out of the four stages (Supplementary

91 Table 4). Twelve out of these 33 genes encode transcription factors (p-value for enrichment:  
92 1.24e-08). Seven have already been connected with a meristem- or stem cell-related function  
93 (Supplementary Table 4) leaving the remaining 26 as candidates for a potential role in stem cell  
94 maintenance.

95 We could not detect significant overlap with transcript analysis in the SAM during flower  
96 induction <sup>7</sup>, probably due to differences in experimental set up and tissue type. The meristem  
97 transcriptome of the *ap1-1; call1-1* double-mutant <sup>6</sup> had limited but significant overlap for  
98 upregulated genes (Supplementary Table 5). Comparison with transcriptome data for different  
99 types of root meristem cells <sup>11</sup> resulted in an overlap especially with upregulated genes with  
100 *WOX5*-expressing cells of the quiescent center (Supplementary Table 5). Also noticeable was  
101 an overlap between upregulated stem cell DEGs with genes related to DNA methylation or  
102 siRNAs highly expressed in meristematic tissue <sup>12</sup> (Fig. 3a). Among these are transcripts of two  
103 Argonaute proteins (*AGO5* and *AGO9*), two histone methyltransferases (*SUVH4* and *SUVR2*),  
104 the nucleosome remodeler *DDM1*, and three putative RNA-dependent RNA polymerases  
105 (*RDR3*, 4, and 5). This indicated that specific family members of prominent epigenetic  
106 components were upregulated in stem cells. Since *AGO9*, *SUVH4*, and *DDM1* (among others)  
107 are necessary for TE repression <sup>13-15</sup>, we asked whether TEs were downregulated in stem cells  
108 relative to the surrounding cells. Indeed, several Arabidopsis TE families <sup>16</sup> were 2-fold less  
109 expressed in stem versus non-stem cells through the four stages (Fig. 4 and Supplementary  
110 Table 6). Surprisingly, with the same significance threshold, we found other TE families that  
111 were more highly expressed in stem than in non-stem cells (Fig. 4, Supplementary Table 6).  
112 Strikingly, at D7, the number of highly expressed TE groups coincided with the lowest number  
113 of downregulated other groups, indicating a transient loss of control over TE expression in stem  
114 cells at this early stage of vegetative growth, followed by resilencing towards generational  
115 transition.

116 TEs overexpressed in D7 were mostly COPIA LTR-retroelements and Mutator-like DNA  
117 transposons but also included Helitrons, gypsy-like LTR elements, and SINEs (Supplementary  
118 Table 6). As LTR retroelements are more prevalent within pericentromeric regions, whereas  
119 SINEs and Helitrons are distributed on chromosome arms <sup>17</sup>, TE expression in stem cells  
120 occurred independently of chromosomal localization. We could not find a bias for TEs that  
121 were recently mobile in natural populations <sup>18</sup>, nor for transposons with new insertions in DNA  
122 methylation-deficient mutants <sup>19,20</sup>.

123 To determine whether TE expression was influenced by changing DNA methylation, we  
124 performed whole-genome bisulfite sequencing of genomic DNA from D7, D14, and D35 stem  
125 and non-stem nuclei, with material from 7 d- and 14 d-old seedlings as reference. Modification  
126 of cytosines in plants (reviewed in <sup>21</sup>) at CG sites (mCG) is mainly achieved by MET1 and  
127 occurs in repetitive sequences as well as along the gene body of protein-coding genes. Cytosine  
128 methylation at CHG sites (mCHG) (H = A, C, or T) is installed by CMT2 and CMT3. Cytosine  
129 methylation at CHH sites (mCHH) is established by DRM1 and DRM2 as well as CMT2.  
130 mCHG and mCHH are mostly restricted to repetitive sequences and important for TE silencing.  
131 mCHG is recognized by the histone methyltransferase SUVH4 which methylates histone H3  
132 on lysine 9, a binding site for CMT3, and thereby reinforces DNA methylation in  
133 heterochromatic domains <sup>22</sup>.

134 Analysis of DNA methylation distribution revealed pronounced differences around the  
135 centromeres for mCHG and mCHH, with the highest mCHG and lowest mCHH portion in stem  
136 cells of D35 (Fig. 5a and Supplementary Fig. 6). Congruent with the distribution along the  
137 chromosomes, metaplot analyses revealed that these methylation differences were found at  
138 TEs, while protein-coding genes were not affected (Fig. 5b). mCHG levels increased with  
139 developmental age, and TEs in stem cells had consistently higher mCHG levels than the

140 respective non-stem cells, reaching a maximum at D35. Conversely, mCHH decreased with  
141 developmental age, most pronounced in stem cells (Fig. 5b).

142 While TE groups varying in genomic location, cytosine content, structure and localization of  
143 repeats, and siRNA targeting sites<sup>17</sup> showed similarly increasing mCHG and decreasing  
144 mCHH in stem cells over developmental time (Supplementary Fig. 7), there was a correlation  
145 with their length: plotting methylation levels of TEs against their size range (Fig. 5c) revealed  
146 that mCHG in older meristems increased more in long TEs (>2.5 kb), parallel to decreasing  
147 mCHH. This suggests a contribution of DDM1, as this chromatin remodeler mediates  
148 methylation preferentially at long TEs<sup>23</sup>.

149 In order to understand which DNA methylation components are involved in methylation  
150 dynamics in stem cells, we identified differentially methylated regions (DMRs) for each  
151 timepoint and compared them with DMRs of mutants lacking different epigenetic  
152 components<sup>24</sup>. Increased mCHG in stem cells was especially pronounced at D14 in hypo-  
153 DMRs of *ddm1*, *suvh4*, *cmt3*, and *suvh456*; DMRs with reduced mCHH overlapped with those  
154 of *cmt2*, *suvh456*, *ddm1*, and *met1* (Fig. 6). This suggested a concerted action between the  
155 chromatin remodeler DDM1 and the reinforcing heterochromatin formation of CMT3 and  
156 histone methyltransferases to establish strong CHG methylation in stem cells entering the  
157 reproductive phase. Furthermore, the reduction of CHH methylation in *cmt2* and *suvh456*  
158 DMRs indicated a functional interference of CMT3 activity in stem cells with the related  
159 CMT2.

160 The elevated TE expression at D7 correlated with a minimum of *AGO5* and *AGO9* transcript  
161 expression (Fig. 3b). While they belong to different clusters of the AGO clade<sup>25</sup>, both have  
162 been previously identified to be expressed in meristematic tissue of embryos<sup>26,27</sup> or in gametes  
163 or gametophytes<sup>28,29</sup>. *AGO5* has not been connected with RNA-directed DNA methylation  
164 (RdDM) of TEs<sup>30</sup>, and neither *ago5* nor *ago9* showed many DMRs in DNA of whole

165 seedlings<sup>24</sup>. However, AGO9 can restore methylation in an *ago4* mutant if accordingly  
166 expressed<sup>26</sup>, suggesting that it can substitute RdDM-related functions. Although their exact  
167 molecular functions and the subpopulation of bound small RNAs in the stem cells remain to be  
168 determined, their expression anticorrelated with active TEs could hint to a specific protection  
169 of germline precursor cells from virus and/or TE invasions. The transient loss of TE control in  
170 early vegetative stages might even provide the sequence-specific information via small RNAs  
171 that are then available for stem cell-enriched or -specific silencing components at later stages.  
172 It has often been noted, but not explained, that mutants lacking major components of the RNA-  
173 directed DNA methylation (RdDM) pathway have no or only mild developmental defects.  
174 Reinforced silencing in stem cells during development, involving additional specific factors  
175 like RDR3, 4, or 5, may be responsible for this resilience. Such a barrier might break down only  
176 upon special conditions, as indicated by stress-induced transposition prior to flower formation  
177 that occurs only in RdDM-compromised mutants<sup>19</sup>. Interestingly, a recent study showed that  
178 male premeiotic meiocytes also exhibit high mCG and mCHG methylation and low mCHH<sup>31</sup>.  
179 This raises the intriguing possibility that cells of the central zone of the SAM enter a germline  
180 DNA methylation state long before they can be cytologically distinguished. Alternatively, our  
181 data could also suggest the presence of several cell types within the central domain of the SAM.  
182 The possibility to extend the isolation of stem cells at different stages, from mutants and under  
183 different external conditions, will enable future experiments to shed more light on epigenetic  
184 maintenance and dynamics in germline precursor cells.

185



186 **Data access**

187 DNA bisulfite and RNA-seq data have been deposited in the ArrayExpress database at EMBL-  
188 EBI ([www.ebi.ac.uk/arrayexpress](http://www.ebi.ac.uk/arrayexpress)) under accession number E-MTAB-5478 and E-MTAB-  
189 5479.

190

191 **Methods**

192 **Plant material**

193 All experiments were performed with *Arabidopsis thaliana* ecotype Col-0, wild type or  
194 transgenic for pCLV3:H2B-mCherry. The pCLV3:H2B-mCherry construct was generated as  
195 follows: the coding sequence of the H2B gene was PCR-amplified with primer H2B-forward  
196 and H2B-reverse (Supplementary Table 7) from cDNA prepared from 14 d-old seedlings. The  
197 vector pCLV3:erCFP<sup>9</sup> was cut with *Bam*HI and *Sac*I, and the H2B amplicon was inserted (In-  
198 Fusion, Clontech) into the open vector. The resulting plasmid was opened with *Sac*I and In-  
199 Fusion-filled with a PCR-amplified mCherry-coding fragment using the primers mCherry-  
200 fusion-F1 and mCherry-fusion-R1 (Supplementary Table 7). Correct sequence of the resulting  
201 vector pCLV3:H2B-mCherry was confirmed by Sanger-sequencing. The construct was used to  
202 generate transgenic plants by the floral dip method<sup>32</sup>. Primary transformants were selected with  
203 glufosinate (Merck) and their progeny screened for lines with a segregation ratio of 3 resistant  
204 to 1 sensitive plant. Homozygous offspring were propagated for seed amplification.

205 **Growth conditions**

206 All plants were grown either *in vitro* on GM medium with or without selection or on soil under  
207 a 16 h light/8 h dark regime at 21°C. Material was always harvested at the same time of the  
208 light period.

209 **Microscopic analysis and immunostaining**

210 For wide-field microscopy, plant material was immersed in PBS buffer and imaged with a Zeiss  
211 Axio Imager epifluorescence microscope. Isolated nuclei were imaged with an LSM780 Axio  
212 Observer, and Images were deconvolved using Hyugens Core (Scientific Volume Imaging)  
213 with a theoretical PSF. Immunostaining was performed according to <sup>33</sup>, with an additional  
214 clearing step using ScaleA <sup>34</sup> and DAPI as counterstain. Anti-mCherry nanobodies were  
215 purchased from Chromotek (#rba594-100). Immunostains of meristems were imaged using the  
216 Airyscan mode on an LSM880 Axio Observer.

### 217 **Fluorescence-activated nuclei sorting (FANS)**

218 For 7D/14C/35D samples, 200-800 apexes (depending on size) of soil-grown plants with the  
219 corresponding age were collected. For embryo samples, ovules from siliques of a few  
220 representative plants were analyzed to contain early heart till early torpedo stage embryos, and  
221 developmentally identical siliques were used to dissect 3000-4000 ovules. Collected material  
222 was immediately transferred into nuclei isolation buffer on ice (NIB: 500 mM sucrose, 100 mM  
223 KCl, 10 mM Tris-HCl pH 9.5, 10 mM EDTA, 4 mM spermidine, 1 mM spermine and 0.1% v/v  
224 2-mercaptoethanol, prepared just before use <sup>35</sup>). The material was then transferred into a tube  
225 containing 1.8 ml of nuclear extraction buffer (NEB of the Sysmex CyStain® PI Absolute P kit  
226 (#05-5022) plus 1% v/v 2-mercaptoethanol) and disrupted with the TissueRuptor (Qiagen) at  
227 the lowest speed for 1 min. The suspension was filtered (30 µm filter nylon mesh, Sysmex #  
228 04-0042-2316) and centrifuged for 10 min at 4000 rcf at 4°C. The nuclear pellet was  
229 resuspended in Precise P staining buffer (Sysmex #05-5022; plus 1% v/v 2-mercaptoethanol  
230 and DAPI to a final concentration of 5 µg/ul), incubated for 15 min and again filtered (30 µm)  
231 into tubes (Sarstedt #55.484.001). Sorting was performed on a BD FACSAria™ III cell sorter  
232 (70 µm nozzle). Forward/Side scatter and DAPI and mCherry gating were adjusted with wild  
233 type nuclei (DAPI-positive, mCherry-negative) as reference. The mCherry gate was adjusted  
234 so that a maximum of 1/10 of mCherry events occurred in wild type compared to the

235 p*CLV3:mCherry-H2B* line. For DNA extraction, nuclei were directly sorted into Genomic  
236 Lysis Buffer (Quick-DNA Microprep Kit, Zymo Research, #D3020,), and DNA was purified  
237 according to the suppliers' protocol for whole blood and serum samples. DNA was quantified  
238 using pico-green on a NanoDrop fluorospectrometer (Thermo Scientific). For RNA isolation,  
239 NIB, NEB, and staining buffer were complemented with RiboLock RNase inhibitor (Thermo  
240 Scientific #EO0381, final concentration 1 U/ $\mu$ l) and nuclei were directly sorted into TRIzol LS  
241 (Ambion, #10296028). RNA was prepared according to the manufacturers' recommendation,  
242 except that nuclease-free glycogen (Thermo Scientific) was added during an overnight  
243 precipitation at -20°C. Amount and quality of RNA was determined on an RNA 6000 pico-chip  
244 (Bioanalyzer/Agilent Technologies). For DNA and RNA extraction, DNA-LoBind tubes  
245 (Eppendorf, #022431021) were used.

#### 246 **qPCR analysis**

247 For qPCR and enrichment analysis, RNA was extracted with TRIzol LS (Ambion) either from  
248 sorted nuclei or from shock-frozen and ground tissue material. RNA was treated with DNase  
249 (Thermo Scientific, #79254) and reverse-transcribed with iScript (Biorad, #172-5038). qPCR  
250 assays were performed with Universal ProbeLibrary (UPL) assays (Roche, # 06402682001)  
251 with primers and probes described in Supplementary Table 7.

#### 252 **Library preparation and sequencing**

253 For RNA library preparation, total RNA of biological duplicates was extracted either from  
254 nuclei directly sorted into TRIzol LS or from shock-frozen ground material and used to generate  
255 cDNA libraries with the SMART-Seq v4 Ultra Low Input RNA Kit (Clontech). For the  
256 comparison with the nuclear RNA transcriptome, RNA was extracted from DAPI-stained  
257 FANSed nuclei isolated from 14 d-old p*CLV3:mCherry-H2B* seedlings with the same protocol  
258 as for cDNA production. cDNA populations were paired-end sequenced on a HiSeq 2500  
259 Illumina sequencing platform. For bisulfite library preparation, at least 200 pg of DNA was

260 used. Libraries were prepared with the Pico Methyl-Seq Library Prep Kit (Zymo Research  
261 #D5456) according to the manufacturer's protocol.

## 262 **Analysis of the RNA-sequencing data**

263 For the analysis of nuclear to total RNA expression correlation, Tophat <sup>36</sup> was used for mapping  
264 to the TAIR10 reference genome after removal of low-quality bases with Trimmomatic <sup>37</sup>  
265 (parameters: LEADING:8 TRAILING:10 SLIDINGWINDOW:4:15 MINLEN:50; ).  
266 Cuffdiff <sup>38</sup> was used for normalization.

267 For all other analysis, RNA-seq reads were first adapter- and quality-trimmed with Trim  
268 Galore! (Krueger F. Trim galore, v0.4.1, with default parameters). The reads were then aligned  
269 to the TAIR10 reference genome (including the mCherry sequence) with STAR <sup>39</sup> (v2.5.2a)  
270 (Supplementary Table 8). Alignment parameters for STAR were set by the quantifier RSEM <sup>40</sup>  
271 (v1.2.30), which are based on previous ENCODE standards. The annotation used for  
272 quantification was Araport11. RSEM was run with default settings. To correct for possible  
273 positional biases in the data, we activated RSEM's positional bias correction option (--estimate-  
274 rspd). The resulting gene expression tables were imported into R (v3.4) via the tximport  
275 package <sup>41</sup> (v1.4.0). Consecutive differential gene expression analysis was performed with  
276 DESeq2 <sup>42</sup> (v1.16). Samples of the same stages were analyzed pairwise via DESeq2s Wald test  
277 (FDR < 0.05). To detect genes that are differentially regulated in stem cells across all  
278 timepoints, we made use of DESeq2's model-based likelihood ratio test (LRT, FDR < 0.05).  
279 The LRT allowed us to investigate how well the expression of a gene is recapitulated by  
280 different models. DESeq2 compares two models, one full model and a reduced model. Our full  
281 model factored in the cell type, the stage, and the interaction of both, while our reduced model  
282 did not factor in the interaction, leaving us with a set of differentially expressed genes whose  
283 variation can be explained by a combination of cell type and time. The RNA-seq pipeline is  
284 available under <https://gitlab.com/nodine-lab/rsem-rna-seq-pipeline/>. GO enrichments were

285 calculated using the AmiGO2 tool and the PANTHER classification system  
286 (<http://amigo.geneontology.org/rte>)<sup>43</sup>. Visualization and clustering of the data was achieved  
287 using the R packages “gplots” and “gclus”.

## 288 **DEG TE-Families**

289 All RNAseq samples were quality-trimmed using cutadapt (v1.14) (Marcel Martin; Cutadapt  
290 removes adapter sequences from high-throughput sequencing reads; EMBnet.journal; Vol17,  
291 No1) and trimmomatic<sup>37</sup> (v0.36). STAR<sup>39</sup> (v2.5.2a) (Col-0 Arabidopsis reference genome, the  
292 Araport11 gene and TE annotations) was used as reference to map the reads, allowing multiple  
293 hits (--outFilterMultimapNmax 100 and --winAnchorMultimapNmax 100). TETranscripts from  
294 the TEToolkit<sup>44</sup> (v1.5.1) was used in multi-mode to find DEG TE-families.

## 295 **Analysis of the bisulfite-sequencing data**

296 Illumina HiSeq 2500 sequencing data was obtained from three stages (D7, D14, and D35) each  
297 in three different settings (+: FANS-sorted stem cell tissue, -: non-stem cell but meristematic  
298 tissue, s; whole seedling). Samples D14 and D35 were sequenced with 125 bp paired end reads,  
299 D7 with 50 bp paired end reads (Supplementary Table 8). The data were quality-checked  
300 (fastqc) and trimmed with TrimGalore (Krueger F. Trim galore, v0.4.1, default settings with  
301 stringency = 1) and trimmomatic<sup>37</sup> (v0.36, sliding window: 4:20, leading: 20). Bismark<sup>45</sup>  
302 (v0.18.1 with Bowtie2 v2.2.9) was used to map the reads to the *Arabidopsis thaliana* Col-0  
303 reference genome (including mitochondria and chloroplast genomes) in the non-directional  
304 mode with a mapping stringency of L,0,-0.6. A mapping-position-based removal of duplicates  
305 (Bismark) was applied, and the C-to-T conversion rate was calculated using the reads mapped  
306 to the chloroplast genome (ranging from 98.9 to 99.5%). Methylation was called (Bismark),  
307 ignoring the first bases according to the M-Bias plots. Samples with same stages and settings  
308 were pooled to a single sample, resulting in genome coverages for the nuclear genome from  
309 16,4x to 53,9x.

310 **DMR analysis**

311 Differentially methylation positions (DMP) were identified by Fisher's exact test. Their  
312 positions were clustered together based on a minimum distance of 50 bp between DMPs to call  
313 a differential methylated region (DMR). DMR calling was done using methylpy  
314 (<https://github.com/yupenghe/methylpy.git>) version 1.1.9. We used custom R and python  
315 scripts for further analysis of these DMRs.

316

317 **Author contributions**

318 R.G. and O.M.S. designed the study and wrote the manuscript, R.G., N.D., A.G., G.B., N.L.,  
319 and M.D. performed the experiments, K.R., T.N., R.P., and F.H. analyzed the data, Ma.N. and  
320 Mi.N. discussed the results and commented on the manuscript.

321 **Acknowledgments**

322 We are grateful for excellent support by the GMI/IMP/IMBA Biooptics facilities, the Next  
323 Generation Sequencing and Plant Sciences units of the Vienna BioCenter Core Facilities  
324 (VBCF). We thank Claude Becker, Frederic Berger, and James Matthew Watson (all GMI,  
325 Vienna) for helpful comments on the manuscript, and Thomas Laux for the CLV3 promoter.  
326 We gratefully acknowledge financial support from the Austrian Science Fund (FWF I489,  
327 I1477 to O.M.S and I3687 to R.G.) and the Plant Fellows Program (to R.G.).

328 **Competing interests**

329 The authors declare no competing financial interest.

330

331

332 **Figure legends**

333 **Figure 1: Establishment of FANS for stem cells of the shoot apical meristem (SAM).**

334 (a) Expression of H2B-mCherry under control of the *CLV3* promoter in 14 d-old seedlings.  
335 Whole-mount immunostaining using  $\alpha$ -mCherry antibodies and laser scanning microscopy  
336 (scale bar 10  $\mu$ m). (b) Example of a FANS experiment: mCherry-positive (+) and mCherry-  
337 negative (-) gates of DAPI-gated nuclei. Numbers indicate total number and percent of DAPI  
338 events. (c) Enrichment of *CLV3* transcript in mCherry-positive nuclei determined by qRT-PCR.

339 **Figure 2: Differential RNA expression in SAM stem cells during development.**

340 (a) Expression of *CLV3*, *mCherry*, and the meristem marker genes *STM* and *KNAT1*. (b)  
341 Hierarchical clustering of expression data. (c) Number of DEGs between stem and non-stem  
342 cells at each timepoint. The banded portion of the bars indicates the number of transcription  
343 factor genes (also in parenthesis). (d) Overlap of genes with higher expression in stem cells  
344 (excluding *mCherry*). s = stem cells; n = non-stem cells.

345 **Figure 3: Expression analysis of genes related to epigenetic regulation.**

346 (a) Expression heatmap (in alphabetical order of gene acronyms). (b) Expression of  
347 significantly upregulated DNA methylation-related genes in stem cells, marked with # in (a).  
348 Asterisks indicate timepoints of significantly different expression between stem and non-stem  
349 cells. s = stem cells; n = non-stem cells.

350 **Figure 4: Expression analysis of transposable elements.**

351 (a) Heatmap of expression differences for all 318 Arabidopsis TE groups in stem cells relative  
352 to non-stem cells at different timepoints. (b) Number of TE groups with at least 2x expression  
353 difference at the different timepoints.

354 **Figure 5: DNA methylation analysis of stem cells at different developmental stages.**

355 (a) CG, CHG, and CHH methylation at chromosome 3 in stem and non-stem cells. (b)  
356 Metaplots of DNA methylation at CG, CHG, and CHH for genes and transposons. (c) Locally  
357 weighted scatterplot smoothing fit of CG, CHG, and CHH methylation levels in stem cells and

358 non-stem cells plotted on TE size. D7, D14 and D35 = sorted nuclei 7, 14, and 35 d.a.g., S7 and  
359 S14 = above-ground seedlings 7 and 14 d. a. g., s = stem cells; n = non-stem cells.

360 **Figure 6: DMR analysis of stem cells.**

361 DNA methylation differences between stem and non-stem cell nuclei within DMRs of different  
362 epigenetic mutants. For each category, the scale denotes the number of standard deviations of  
363 differential methylation in relation to the rest of the genome.

364

365 **Supplementary Figure 1: Isolation of stem cell nuclei and RNA comparison.**

366 (a) Gating strategy used for FANS of stem cells. Representative FANS plots are shown. Events  
367 are gated for DAPI (top row) and next either for mCherry+ or mCherry- (bottom row). For  
368 numbers see also Supplementary Table 1. (b) Examples of mCherry-positive nuclei after FANS  
369 (scale bar 5  $\mu$ m). (c) Correlation of log<sub>10</sub>-normalized FPKM values of nuclear and total RNA  
370 extracted from 14 d-old seedlings.

371 **Supplementary Figure 2: Growth stages used for genome-wide expression and DNA  
372 methylation analysis in stem and non-stem cells.**

373 (a) Developmental stages of representative plants (scale bars 1 cm). (b) Wide-field microscopic  
374 images with RFP filters. (c) LSM pictures of representative plants. For better visualization  
375 DAPI was used as counterstain in E, D7 and D14. IM = Inflorescence meristem. FM = Floral  
376 meristem. Scale bars in (b): 60  $\mu$ m for the embryo; 1 mm for the other three stages. Scale bars  
377 in (c): 20  $\mu$ m.

378 **Supplementary Figure 3: Clustered heatmap displaying GO-term enrichment.**

379 Color codes represent the negative ln of the Bonferroni corrected p-value for enrichment of  
380 each GO-term. A p-value of 0.05 corresponds approximately to 3. See also Supplementary  
381 Table 3 for exact values. s = stem cells; n = non-stem cells.

382 **Supplementary Figure 4: Overlap of DEGs at different timepoints.**



383 (a) Venn diagrams for genes up- and (b) downregulated in stem cells, respectively. (c) p-values  
384 (hypergeometric tests) for likelihood of overlap of upregulated genes in different pairs of  
385 timepoints.

386 **Supplementary Figure 5: Expression of core stemness genes.**

387 Bar plots of expression of genes that are significantly upregulated in SAM stem cells throughout  
388 development. s = stem cells; n = non-stem cells.

389 **Supplementary Figure 6: DNA methylation analysis of stem cells on all five Arabidopsis  
390 chromosomes in stem and non-stem cells at different developmental stages.**

391 s = stem cells; n = non-stem cells.

392 **Supplementary Figure 7: DNA methylation analysis of different TE classes in stem and  
393 non-stem cells at different developmental stages.**

394 s = stem cells; n = non-stem cells.

395

396 **Supplementary Table 1: Examples of FANS data**

397 **Supplementary Table 2: RNA expression data**

398 **Supplementary Table 3: GO-term annotations**

399 **Supplementary Table 4: Overlapping DEGs**

400 **Supplementary Table 5: Comparison with other data sets**

401 **Supplementary Table 6: TE expression data**

402 **Supplementary Table 7: Primer sequences**

403 **Supplementary Table 8: Mapping statistics**

404

405 **References**

406

- 407 1. d'Amato, F. Role of somatic mutations in the evolution of higher plants *Caryologia* **50**, 1-15
- 408 (1997).
- 409 2. Haig, D. Transposable elements: Self-seekers of the germline, team-players of the soma.
- 410 *Bioessays* **38**, 1158-1166 (2016).
- 411 3. Greb, T. & Lohmann, J.U. Plant stem cells. *Current Biology* **26**, R816-R821 (2016).
- 412 4. Soyars, C.L., James, S.R. & Nimchuk, Z.L. Ready, aim, shoot: stem cell regulation of the
- 413 shoot apical meristem. *Current Opinion in Plant Biology* **29**, 163-168 (2016).
- 414 5. Yadav, R.K., Tavakkoli, M., Xie, M., Girke, T. & Reddy, G.V. A high-resolution gene
- 415 expression map of the Arabidopsis shoot meristem stem cell niche. *Development* **141**, 2735-
- 416 2744 (2014).
- 417 6. Yadav, R.K., Girke, T., Pasala, S., Xie, M. & Reddy, G.V. Gene expression map of the
- 418 Arabidopsis shoot apical meristem stem cell niche. *Proc Natl Acad Sci U S A* **106**, 4941-6
- 419 (2009).
- 420 7. You, Y. *et al.* Temporal dynamics of gene expression and histone marks at the Arabidopsis
- 421 shoot meristem during flowering. *Nat Commun* **8**, 15120 (2017).
- 422 8. Sijacic, P., Bajic, M., McKinney, E.C., Meagher, R.B. & Deal, R.B. Changes in chromatin
- 423 accessibility between Arabidopsis stem cells and mesophyll cells illuminate cell type-specific
- 424 transcription factor networks. *Plant Journal* **94**, 215-231 (2018).
- 425 9. Tucker, M.R. *et al.* Vascular signalling mediated by ZWILLE potentiates WUSCHEL
- 426 function during shoot meristem stem cell development in the Arabidopsis embryo.
- 427 *Development* **135**, 2839-43 (2008).
- 428 10. Zhang, C., Barthelson, R.A., Lambert, G.M. & Galbraith, D.W. Global characterization of
- 429 cell-specific gene expression through fluorescence-activated sorting of nuclei. *Plant Physiol*
- 430 **147**, 30-40 (2008).
- 431 11. de Luis Balaguer, M.A. *et al.* Predicting gene regulatory networks by combining spatial and
- 432 temporal gene expression data in Arabidopsis root stem cells. *Proc Natl Acad Sci U S A* **114**,
- 433 E7632-E7640 (2017).
- 434 12. Baubec, T., Finke, A., Mittelsten Scheid, O. & Pecinka, A. Meristem-specific expression of
- 435 epigenetic regulators safeguards transposon silencing in Arabidopsis. *EMBO Rep* **15**, 446-52
- 436 (2014).
- 437 13. Duran-Figueroa, N. & Vielle-Calzada, J.P. ARGONAUTE9-dependent silencing of
- 438 transposable elements in pericentromeric regions of Arabidopsis. *Plant Signal Behav* **5**.
- 439 14. Hirochika, H., Okamoto, H. & Kakutani, T. Silencing of retrotransposons in arabidopsis and
- 440 reactivation by the *ddm1* mutation. *Plant Cell* **12**, 357-368 (2000).
- 441 15. Lippman, Z., May, B., Yordan, C., Singer, T. & Martienssen, R. Distinct mechanisms
- 442 determine transposon inheritance and methylation via small interfering RNA and histone
- 443 modification. *Plos Biology* **1**, 420-428 (2003).
- 444 16. Arabidopsis\_Genome\_Initiative. Analysis of the genome sequence of the flowering plant
- 445 Arabidopsis thaliana. *Nature* **408**, 796-815 (2000).
- 446 17. Underwood, C.J., Henderson, I.R. & Martienssen, R.A. Genetic and epigenetic variation of
- 447 transposable elements in Arabidopsis. *Curr Opin Plant Biol* **36**, 135-141 (2017).
- 448 18. Quadrana, L. & Colot, V. Plant transgenerational epigenetics. in *Annual Review of Genetics*,
- 449 Vol 50, Vol. 50 (ed. Bonini, N.M.) 467-491 (2016).
- 450 19. Ito, H. *et al.* An siRNA pathway prevents transgenerational retrotransposition in plants
- 451 subjected to stress. *Nature* **472**, 115-U151 (2011).
- 452 20. Tsukahara, S. *et al.* Bursts of retrotransposition reproduced in Arabidopsis. *Nature* **461**, 423-6
- 453 (2009).
- 454 21. Zhang, H., Lang, Z. & Zhu, J.K. Dynamics and function of DNA methylation in plants.
- 455 *Nature Reviews Molecular Cell Biology* **19**, 489-506 (2018).
- 456 22. Du, J.M. *et al.* Mechanism of DNA methylation-directed histone methylation by
- 457 KRYPTONITE. *Molecular Cell* **55**, 495-504 (2014).
- 458 23. Zemach, A. *et al.* The Arabidopsis nucleosome remodeler DDM1 allows DNA
- 459 methyltransferases to access H1-containing heterochromatin. *Cell* **153**, 193-205 (2013).

- 460 24. Stroud, H., Greenberg, M.V.C., Feng, S.H., Bernatavichute, Y.V. & Jacobsen, S.E.  
461 Comprehensive analysis of silencing mutants reveals complex regulation of the Arabidopsis  
462 methylome. *Cell* **152**, 352-364 (2013).
- 463 25. Vaucheret, H. Plant ARGONAUTES. *Trends in Plant Science* **13**, 350-358 (2008).
- 464 26. Havecker, E.R. *et al.* The Arabidopsis RNA-directed DNA Methylation Argonautes  
465 functionally diverge based on their expression and interaction with target loci. *Plant Cell* **22**,  
466 321-334 (2010).
- 467 27. Scutt, C.P. *et al.* The identification of candidate genes for a reverse genetic analysis of  
468 development and function in the Arabidopsis gynoecium. *Plant Physiology* **132**, 653-665  
469 (2003).
- 470 28. Olmedo-Monfil, V. *et al.* Control of female gamete formation by a small RNA pathway in  
471 Arabidopsis. *Nature* **464**, 628-32 (2010).
- 472 29. Tucker, M.R. *et al.* Somatic small RNA pathways promote the mitotic events of  
473 megagametogenesis during female reproductive development in Arabidopsis. *Development*  
474 **139**, 1399-1404 (2012).
- 475 30. Havecker, E.R., Wallbridge, L.M., Fedito, P., Hardcastle, T.J. & Baulcombe, D.C. Metastable  
476 differentially methylated regions within Arabidopsis inbred populations are associated with  
477 modified expression of non-coding transcripts. *Plos One* **7**(2012).
- 478 31. Walker, J. *et al.* Sexual-lineage-specific DNA methylation regulates meiosis in Arabidopsis.  
479 *Nat Genet* **50**, 130-137 (2018).
- 480 32. Clough, S.J. & Bent, A.F. Floral dip: a simplified method for Agrobacterium-mediated  
481 transformation of Arabidopsis thaliana. *Plant Journal* **16**, 735-743 (1998).
- 482 33. Pasternak, T. *et al.* Protocol: an improved and universal procedure for whole-mount  
483 immunolocalization in plants. *Plant Methods* **11**, 50 (2015).
- 484 34. Hama, H. *et al.* Scale: a chemical approach for fluorescence imaging and reconstruction of  
485 transparent mouse brain. *Nat Neurosci* **14**, 1481-8 (2011).
- 486 35. Pavlova, P., Tessadori, F., de Jong, H.J. & Fransz, P. Immunocytological analysis of  
487 chromatin in isolated nuclei. *Methods Mol Biol* **655**, 413-32 (2010).
- 488 36. Trapnell, C., Pachter, L. & Salzberg, S.L. TopHat: discovering splice junctions with RNA-  
489 Seq. *Bioinformatics* **25**, 1105-1111 (2009).
- 490 37. Bolger, A.M., Lohse, M. & Usadel, B. Trimmomatic: a flexible trimmer for Illumina sequence  
491 data. *Bioinformatics* **30**, 2114-2120 (2014).
- 492 38. Trapnell, C. *et al.* Differential gene and transcript expression analysis of RNA-seq  
493 experiments with TopHat and Cufflinks. *Nat Protoc* **7**, 562-78 (2012).
- 494 39. Dobin, A. & Gingeras, T.R. Mapping RNA-seq reads with STAR. *Current Protocols in*  
495 *Bioinformatics* **51**(2015).
- 496 40. Li, B. & Dewey, C.N. RSEM: accurate transcript quantification from RNA-Seq data with or  
497 without a reference genome. *BMC Bioinformatics* **12**, 323 (2011).
- 498 41. Sonesson, C., Love, M.I. & Robinson, M.D. Differential analyses for RNA-seq: transcript-level  
499 estimates improve gene-level inferences. *F1000Res* **4**, 1521 (2015).
- 500 42. Love, M.I., Huber, W. & Anders, S. Moderated estimation of fold change and dispersion for  
501 RNA-seq data with DESeq2. *Genome Biol* **15**, 550 (2014).
- 502 43. Mi, H., Muruganujan, A., Casagrande, J.T. & Thomas, P.D. Large-scale gene function  
503 analysis with the PANTHER classification system. *Nat Protoc* **8**, 1551-66 (2013).
- 504 44. Jin, Y., Tam, O.H., Paniagua, E. & Hammell, M. Tetranscripts: a package for including  
505 transposable elements in differential expression analysis of RNA-seq datasets. *Bioinformatics*  
506 **31**, 3593-3599 (2015).
- 507 45. Krueger, F. & Andrews, S.R. Bismark: a flexible aligner and methylation caller for Bisulfite-  
508 Seq applications. *Bioinformatics* **27**, 1571-1572 (2011).

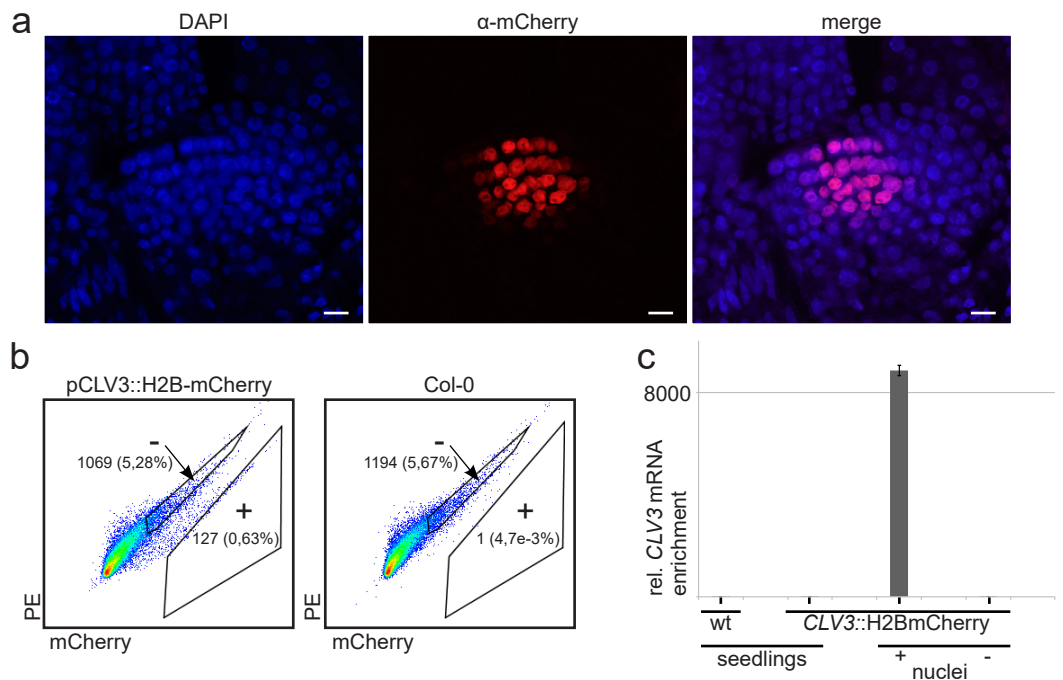

**Figure 1 | Establishment of FANS for stem cells of the shoot apical meristem (SAM).**  
**(a)** Expression of H2B-mCherry under control of the *CLV3* promoter in 14 d-old seedlings. Whole-mount immunostaining using  $\alpha$ -mCherry antibodies and laser scanning microscopy (scale bar 10  $\mu$ m). **(b)** Example of a FANS experiment: mCherry-positive (+) and mCherry-negative (-) gates of DAPI-gated nuclei. Numbers indicate total number and percent of DAPI events. **(c)** Enrichment of *CLV3* transcript in mCherry-positive nuclei determined by qRT-PCR.

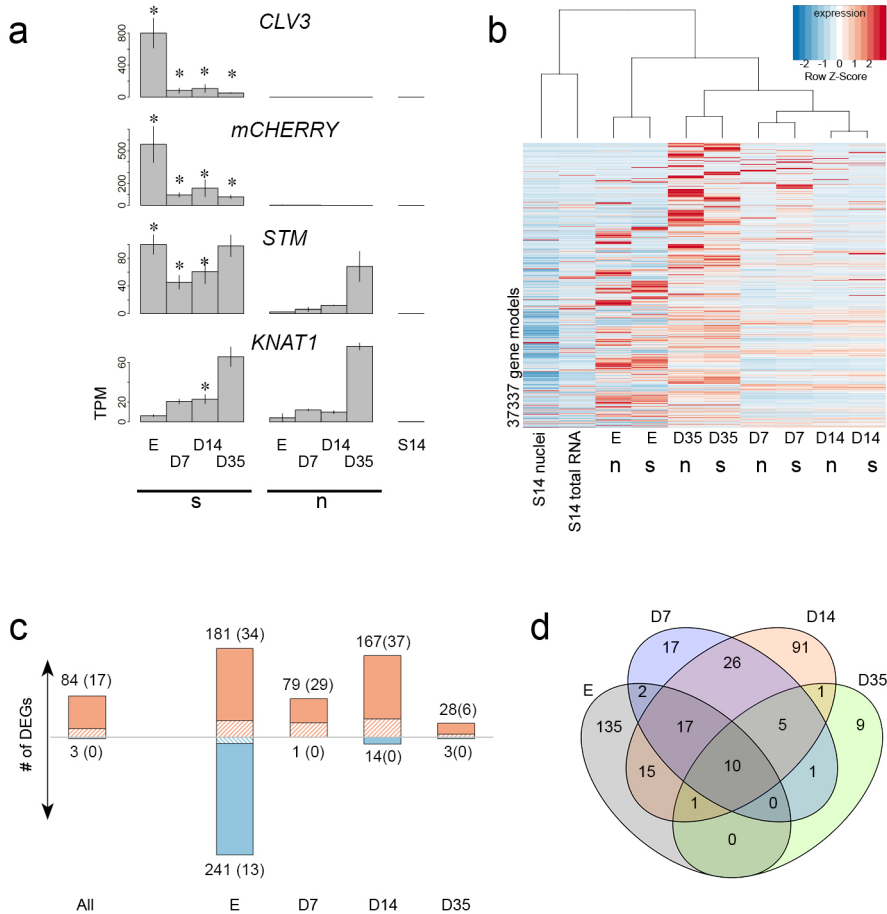

**Figure 2 | Differential RNA expression in SAM stem cells during development. (a)** Expression of *CLV3*, *mCherry* and the meristem marker genes *STM* and *KNAT1*. **(b)** Hierarchical clustering of expression data. **(c)** Number of DEGs between stem and non-stem cells at each timepoint. The banded portion of the bars indicates the number of transcription factor genes (also in parenthesis). **(d)** Overlap of genes with higher expression in stem cells (excluding *mCherry*). s = stem cells; n = non-stem cells.

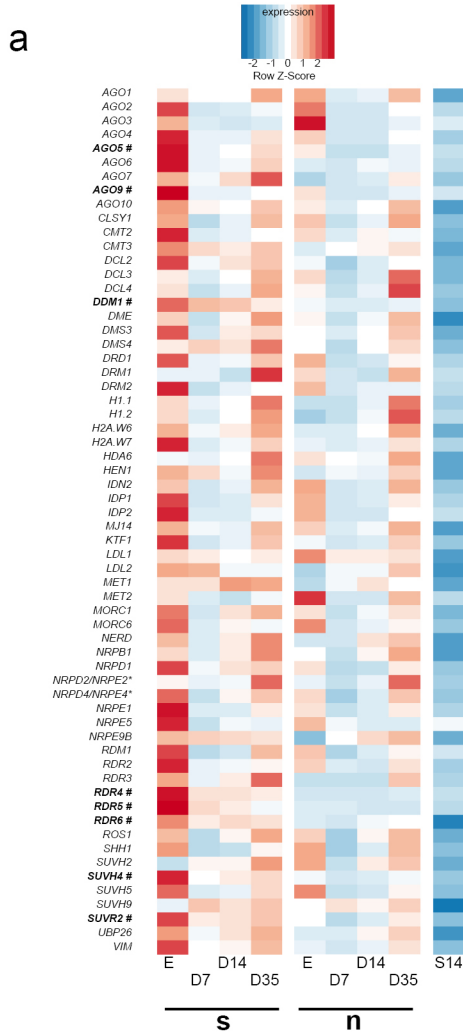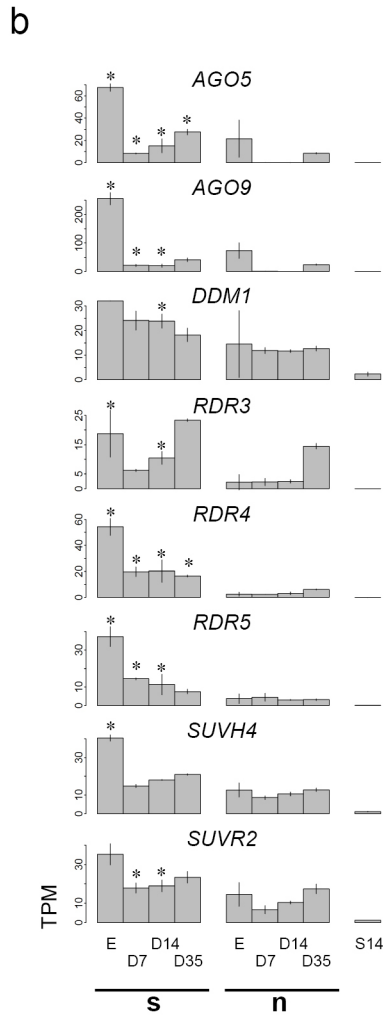

**Figure 3 | Expression analysis of genes related to epigenetic regulation. (a)** Expression heatmap (in alphabetical order of gene acronym). **(b)** Expression of significantly upregulated DNA methylation-related genes in stem cells, marked with # in (a). Asterisks indicate time-points of significantly different expression between stem and non-stem cells. s = stem cells; n = non stem cells.

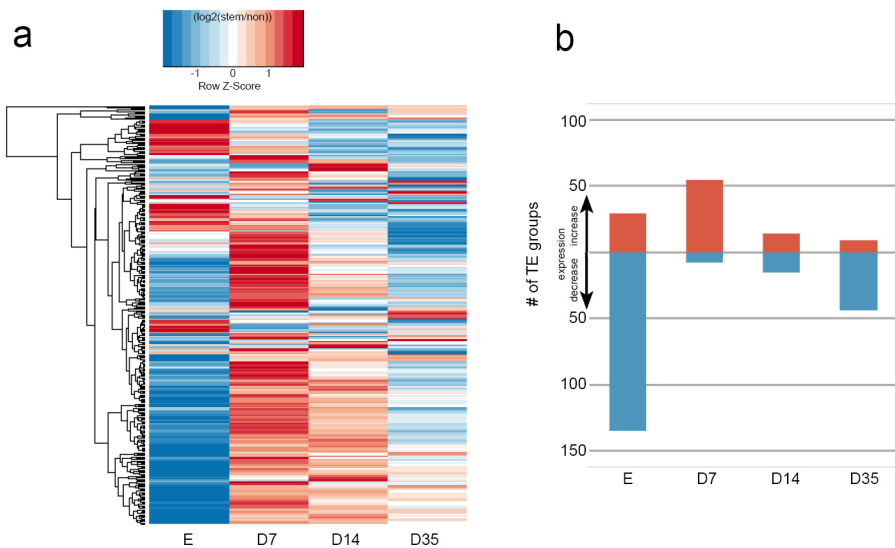

**Figure 4 | Expression analysis of transposable elements. (a)** Heatmap of expression differences for all 318 Arabidopsis TE groups in stem cells relative to non-stem cells at different timepoints. **(b)** Number of TE groups with at least 2x expression difference at the different timepoints.

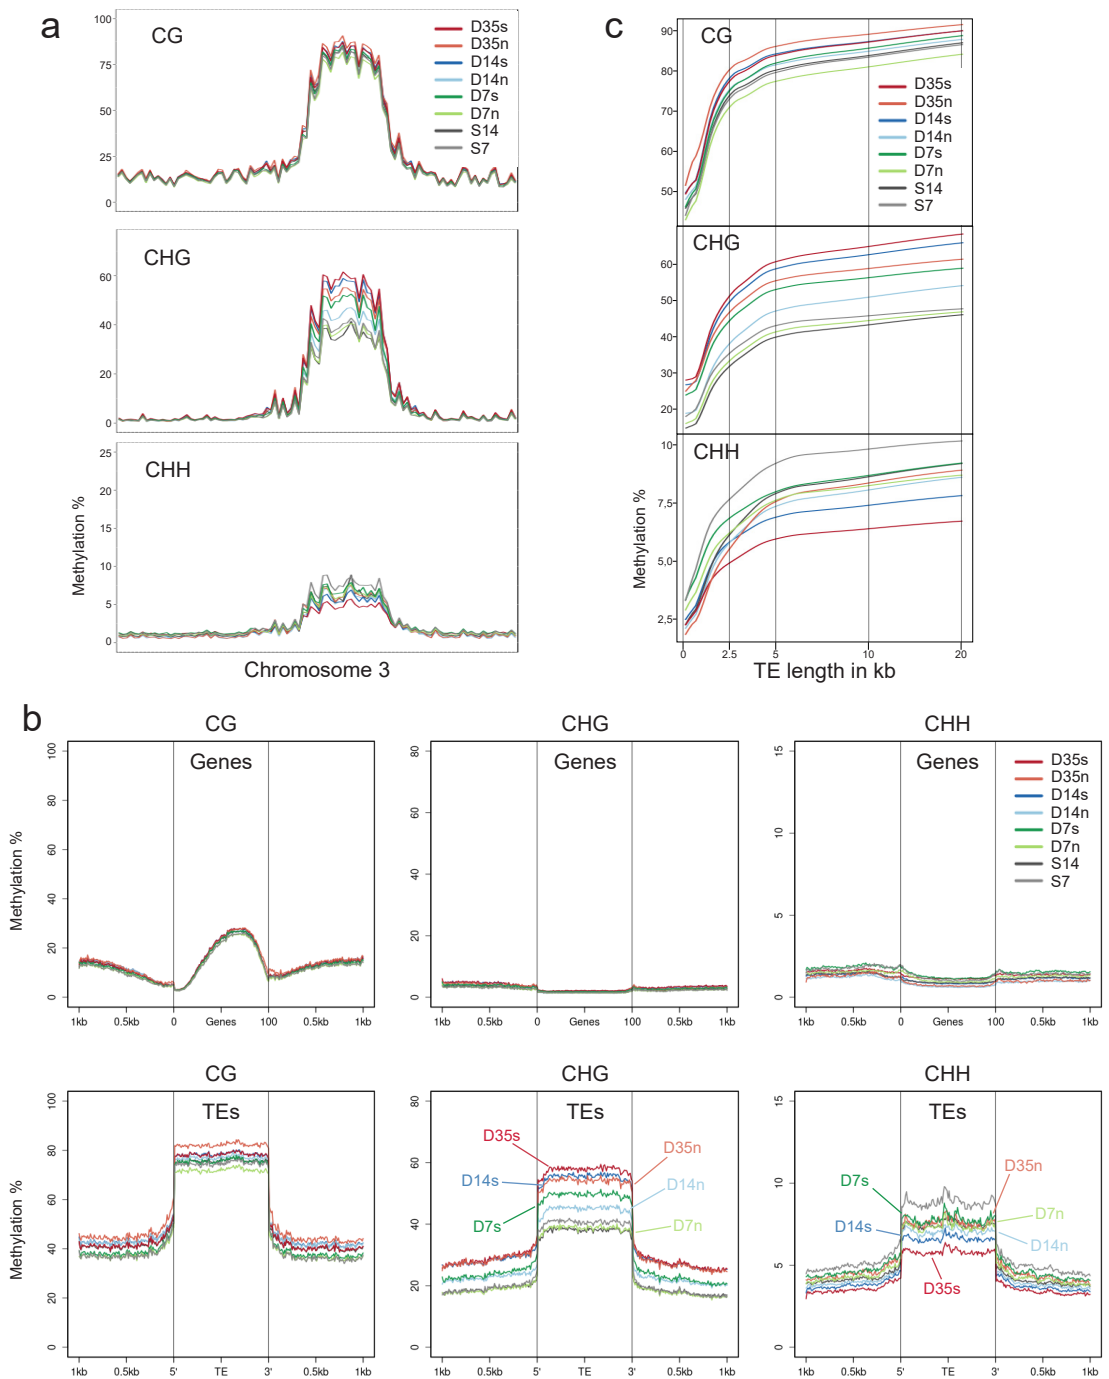

**Figure 5 | DNA methylation analysis of stem cells at different developmental stages.** (a) CG, CHG and CHH methylation of chromosome 3 in stem and non-stem cells. (b) Metaplots of DNA methylation at CG, CHG, and CHH for genes and transposons. (c) Locally weighted scatterplot smoothing fit of CG, CHG and CHH methylation levels in stem cells and non-stem cells plotted on TE size. D7, D14 and D35 = sorted nuclei 7, 14, and 35 d.a.g., S7 and S14 = above-ground seedlings 7 and 14 d. a. g., s = stem cells; n = non-stem cells.



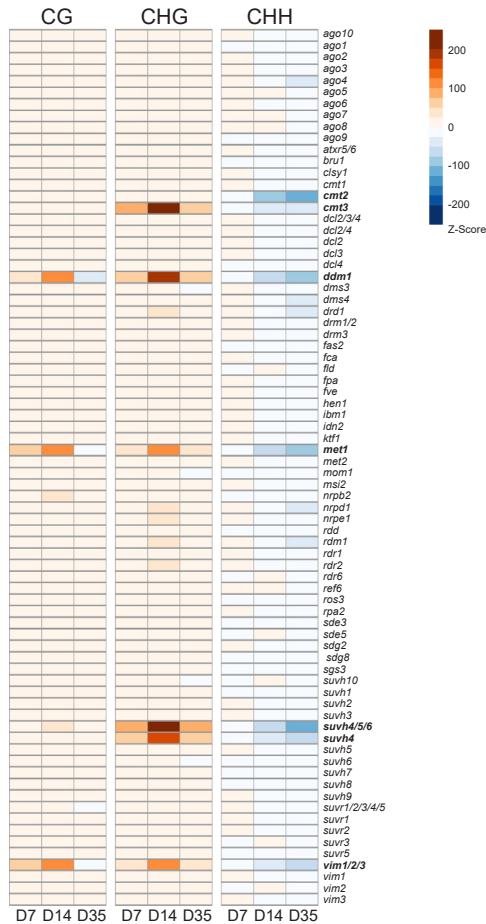

**Figure 6| DMR analysis of stem cells.**

DNA methylation differences between stem and non-stem cell nuclei within DMRs of different epigenetic mutants. For each category, the scale denotes the number of standard deviations of differential methylation in relation to the rest of the genome.

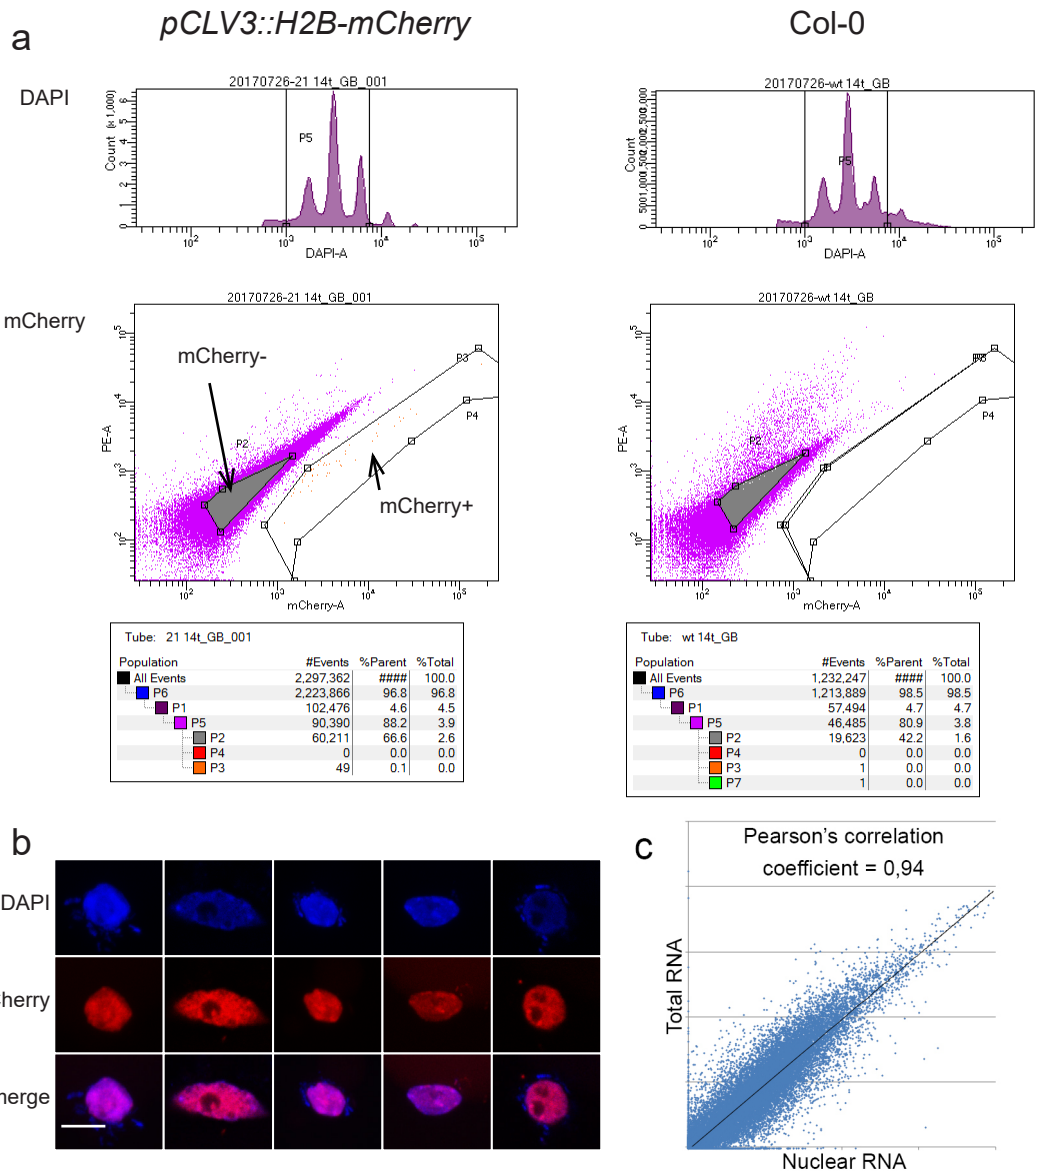

**Supplementary Figure 1 | Isolation of stem cell nuclei and RNA comparison.** (a) Gating strategy used for FANS of stem cells. Representative FANS plots are shown. Events are gated for DAPI (top row) and next either for mCherry+ or mCherry- (bottom row). For numbers see also Supplementary Table S1. (b) Examples of mCherry-positive nuclei after FANS (scale bar 5  $\mu$ m). (c) Correlation of log<sub>10</sub>-normalized FPKM values of nuclear and total RNA extracted from 14 d-old seedlings.

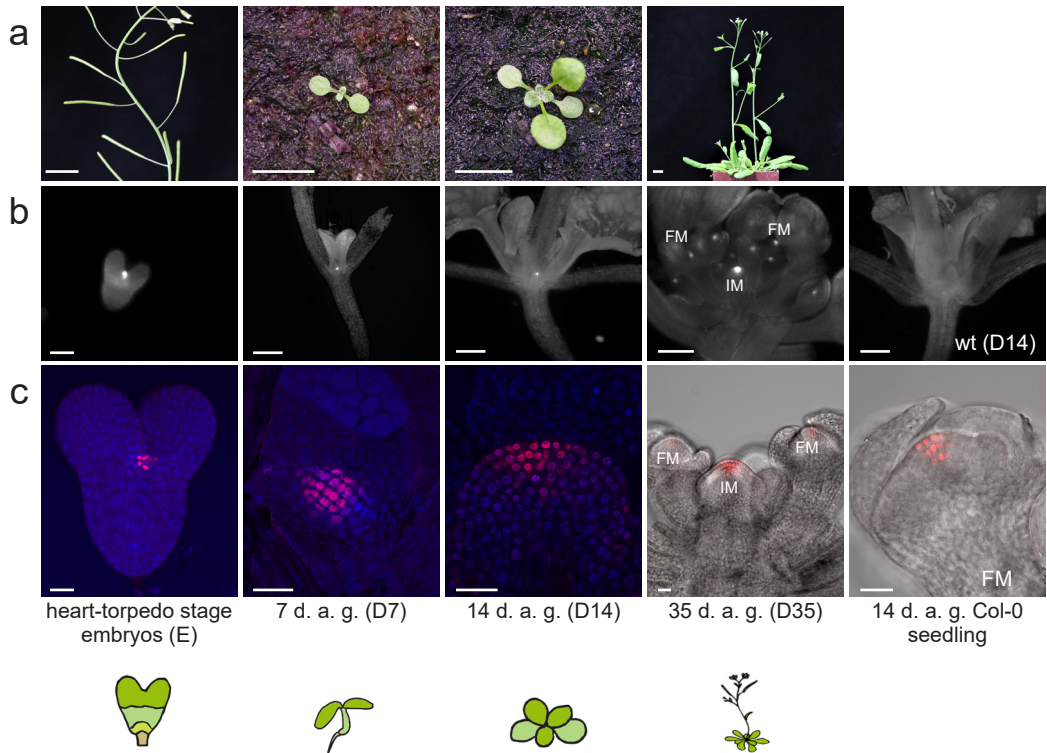

**Supplementary Figure 2 | Growth stages used for genome-wide expression and DNA methylation analysis in stem and non-stem cells.** (a) Developmental stages of representative plants (scale bars 1 cm). (b) Wide-field microscopic images with RFP filters. (c) LSM pictures of representative plants. For better visualization DAPI was used as counterstain in E, D7 and D14. IM = Inflorescence meristem. FM = Floral meristem. Scale bars in (b): 60  $\mu\text{m}$  for the embryo; 1 mm for the other three stages. Scale bars in (c): 20  $\mu\text{m}$ .

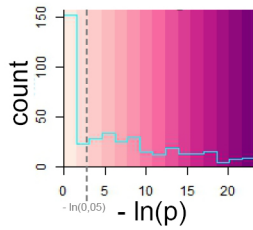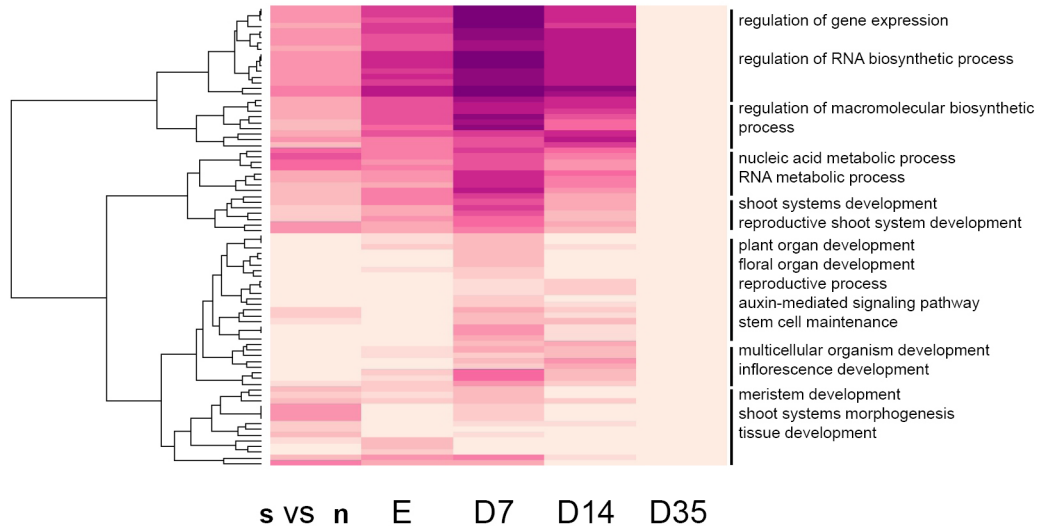

**Supplementary Figure 3 | Clustered heatmap displaying GO-term enrichment.** Color codes represent the negative  $\ln$  of the Bonferroni corrected p-value for enrichment of each GO-term. A p-value of 0.05 corresponds approximately to 3. See also Supplementary Table S3 for exact values. s = stem cells; n = non stem cells.

a

UP

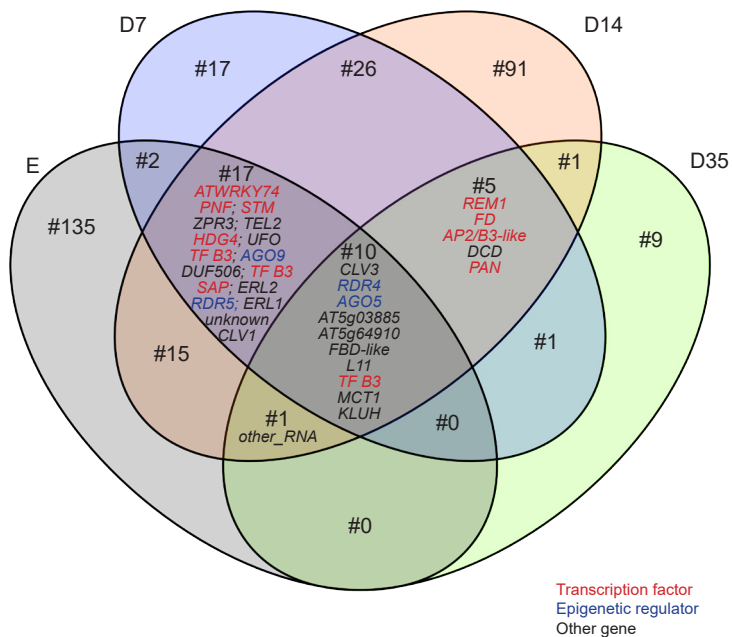

b

DOWN

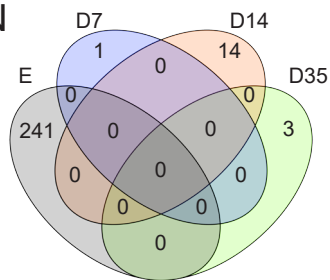

c

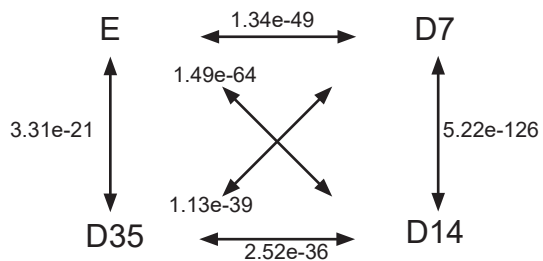

**Supplementary Figure 4 | Overlap of DEGs at different timepoints.** (a) Venn diagrams for genes up- and (b) downregulated in stem cells, respectively. (c) p-values (hypergeometric tests) for likelihood of overlap of upregulated genes in different pairs of timepoints.

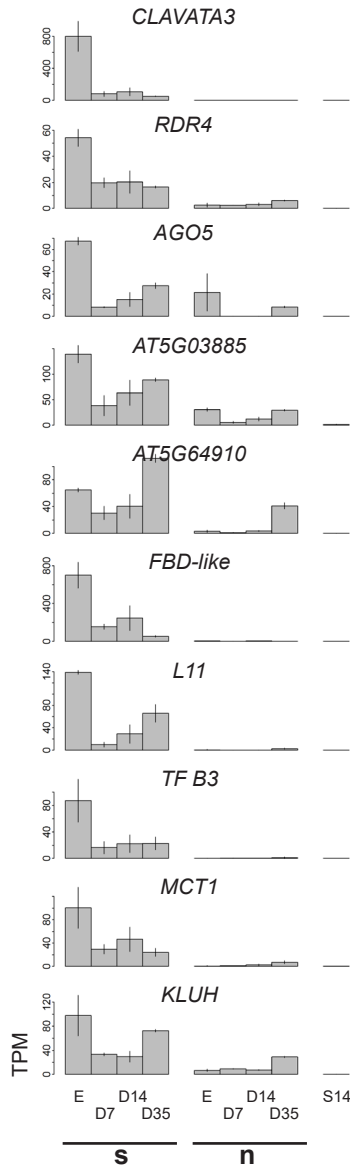

**Supplementary Figure 5 | Expression of core stemness genes.** Bar plots of expression of genes that are significantly upregulated in SAM stem cells throughout development. s = stem cells; n = non stem cells.

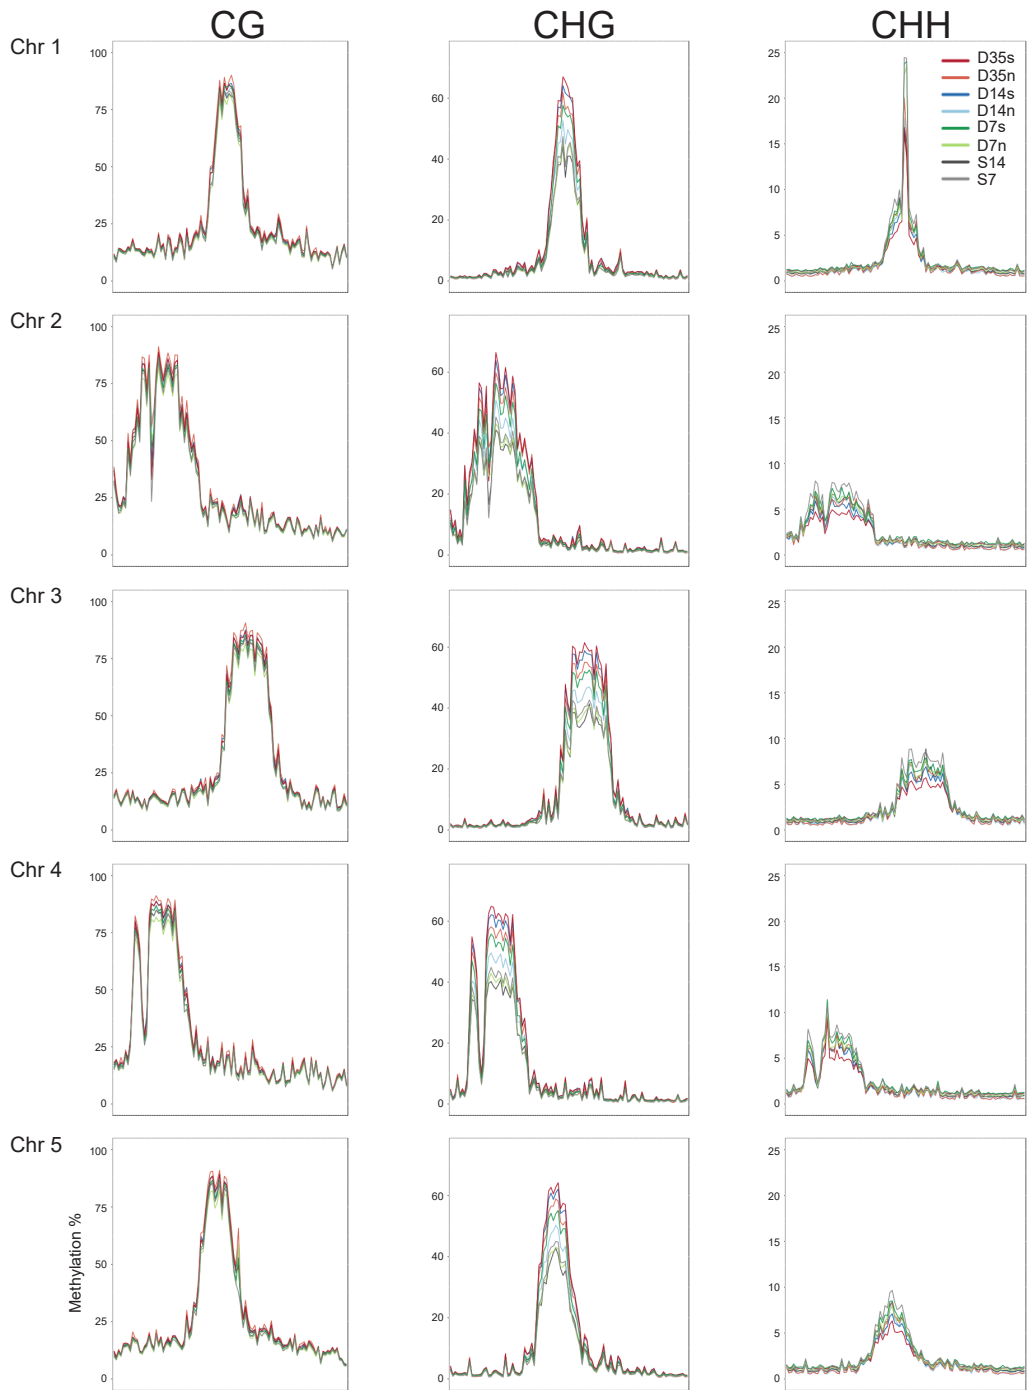

**Supplementary Figure 6 | DNA methylation analysis of stem cells on all five Arabidopsis chromosomes in stem and non-stem cells at different developmental stages.**  
 s = stem cells; n = non-stem cells.

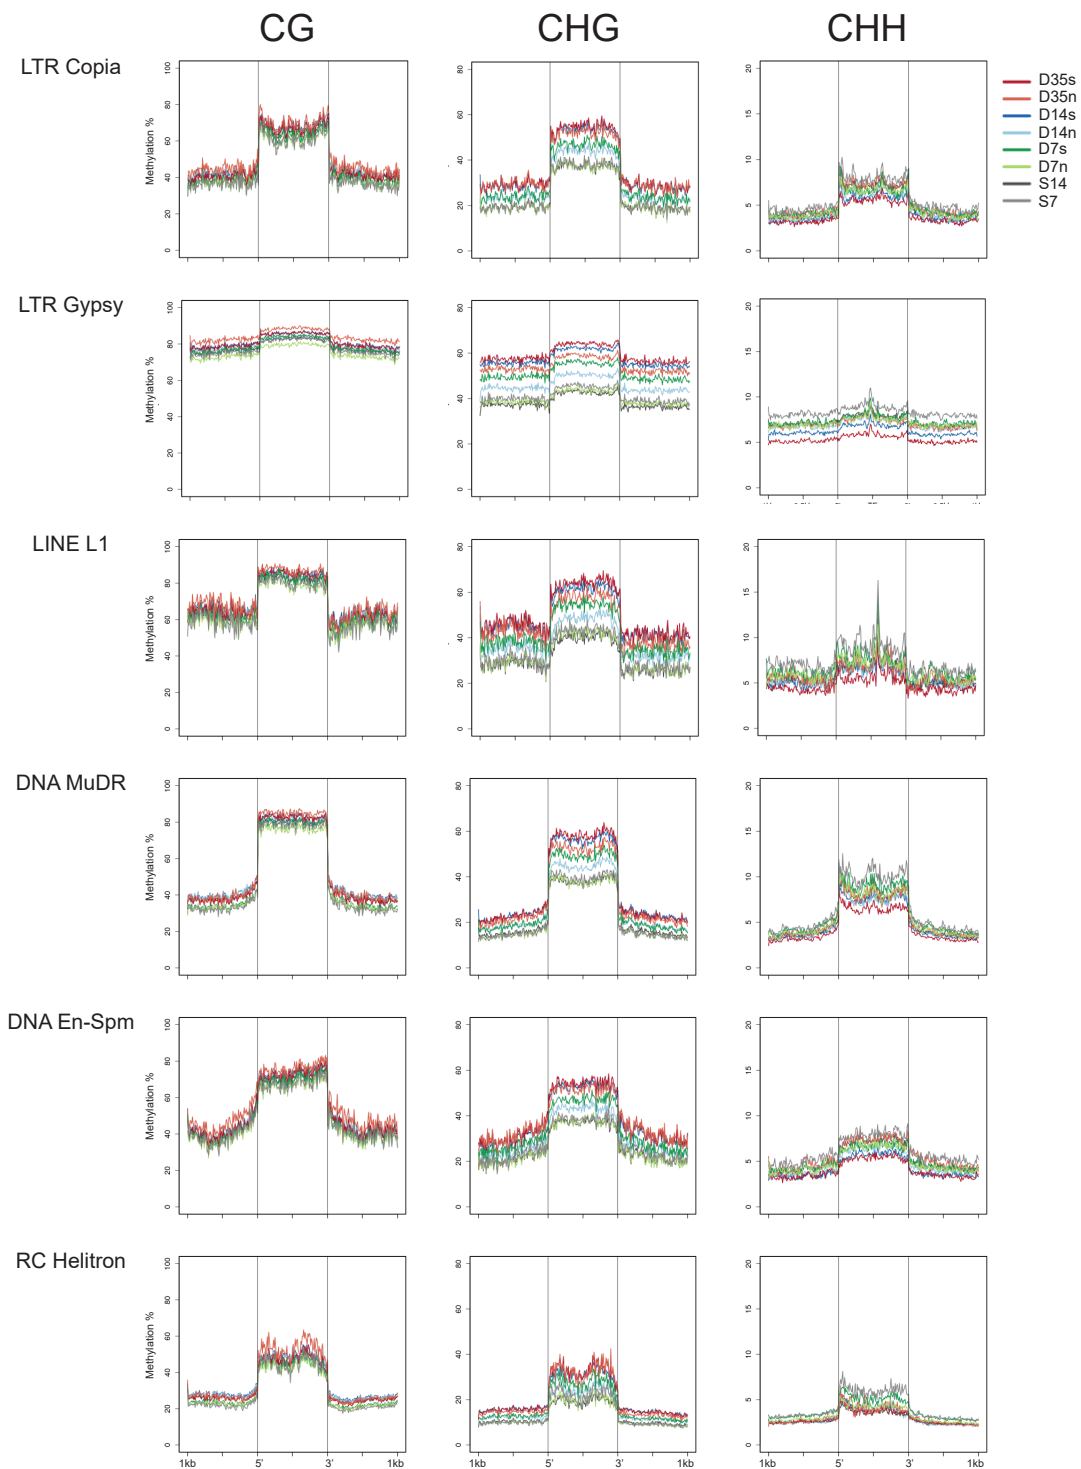

**Supplementary figure 7 | DNA methylation analysis of different TE classes in stem and non-stem cells at different developmental stages. s = stem cells; n = non-stem cells.**
